# Supplementary material
Source: Springer Nature journal article supplement (https://www.springermedizin.de/resource/supplementary/13054_2011_9786_MOESM2_ESM.pdf/9707072)
Supplement: MOESM2 [file 9707072]

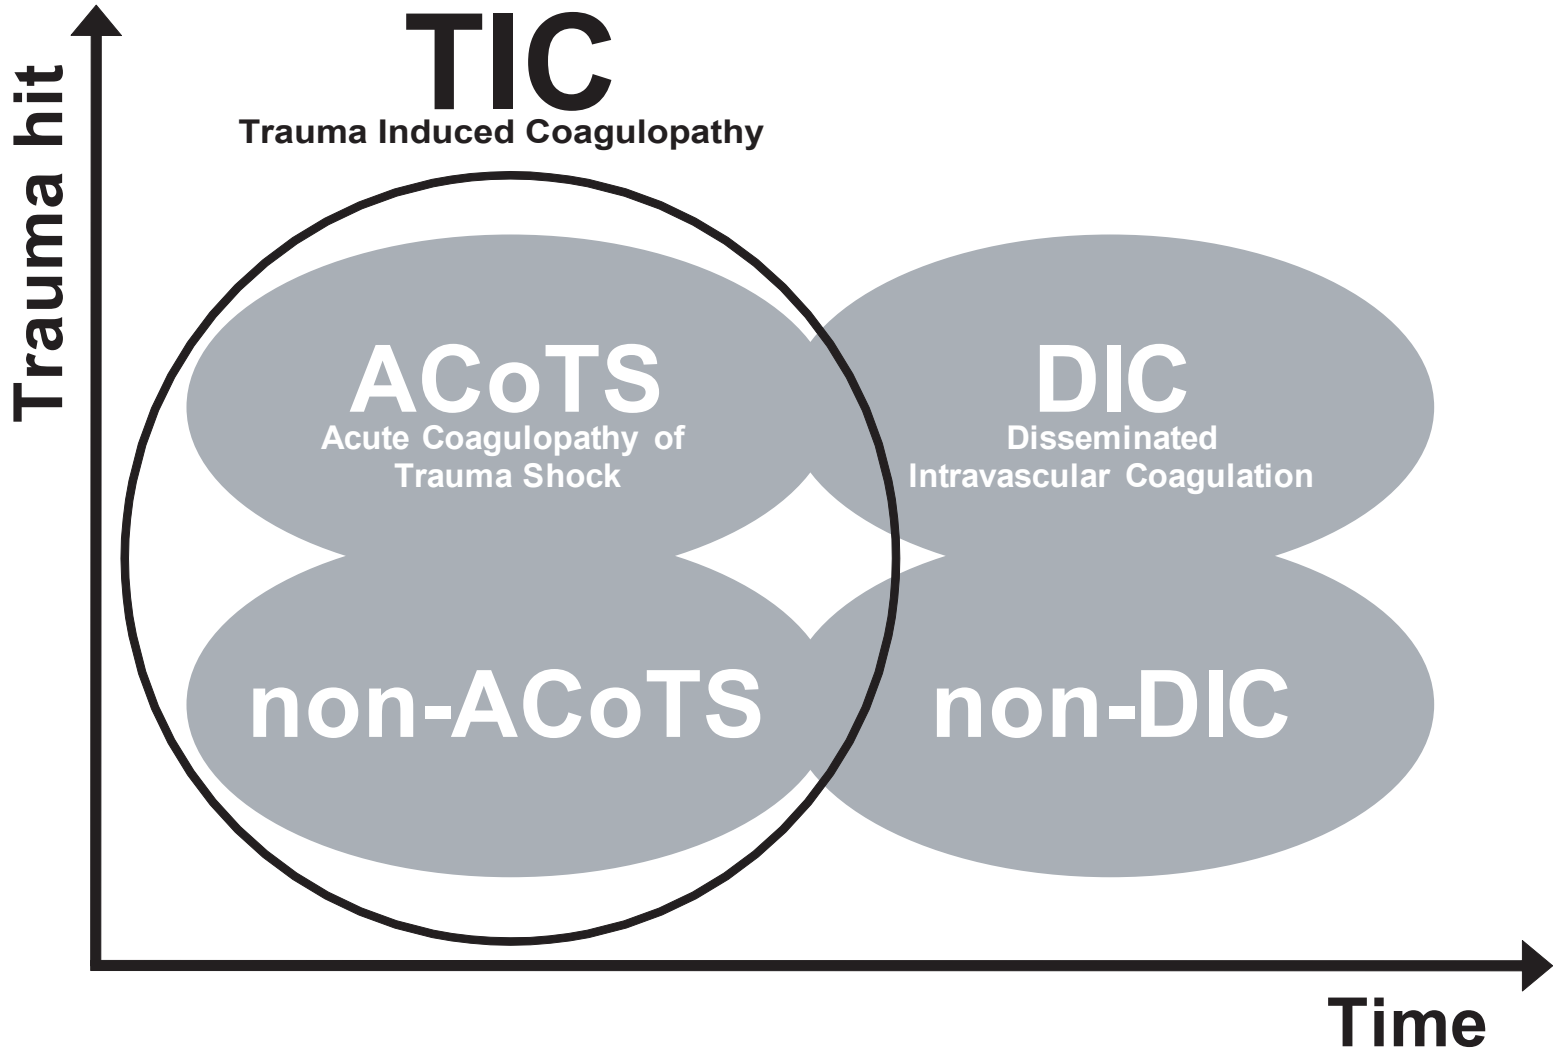

# TIC

Trauma Induced Coagulopathy

## ACoTS

Acute Coagulopathy of Trauma Shock

## DIC

Disseminated Intravascular Coagulation

## non-ACoTS

## non-DIC

Trauma hit

Time
